# Supplementary material
Source: MDPI journal article supplement (https://www.mdpi.com/2073-4344/12/6/609)
Supplement: s1 [file s1]

# Facile Synthesis of Various $\text{ZrO}_2$ Phases and $\text{ZrO}_2\text{-MO}_2$ ( $\text{M}=\text{Ti}, \text{Hf}$ ) by Thermal Decomposition of a Single UiO-66 Precursor for Photodegradation of Methyl Orange

Ira Nur Arba'atul Jannah <sup>1</sup>, Hanu Fiorena Sekarsari <sup>1</sup>, Sri Mulijani <sup>2</sup>, Karna Wijaya <sup>3</sup>, Arief Cahyo Wibowo <sup>4,\*,\dagger</sup> and Aep Patah <sup>1,\*</sup>

<sup>1</sup> Division of Inorganic and Physical Chemistry, Faculty of Mathematics and Natural Sciences, Institut Teknologi Bandung, Jl. Ganesha 10, Bandung 40132, Indonesia; iranurarbaatuljannah@gmail.com (I.N.A.J.); hanufiorena@gmail.com (H.F.S.)

<sup>2</sup> Department of Chemistry, Faculty of Mathematics and Natural Sciences, Institut Pertanian Bogor, Tanjung Campus of IPB Dramaga, Bogor 16680, Indonesia; srimulijani@apps.ipb.ac.id

<sup>3</sup> Department of Chemistry, Faculty of Mathematics and Natural Sciences, Gadjah Mada University, Bulaksumur Bls. 21, Sekip Utara, Yogyakarta 55281, Indonesia; karnawijaya@ugm.ac.id

<sup>4</sup> School of Advanced Technology and Multidiscipline, Universitas Airlangga, Campus C Mulyorejo, Surabaya 60115, Indonesia

\* Correspondence: arief.wibowo@adu.ac.ae (A.C.W.); aep@itb.ac.id (A.P.)

\dagger Present address: Department of Applied Sciences, College of Arts and Sciences, Abu Dhabi University, Abu Dhabi, 59911, United Arab Emirates.

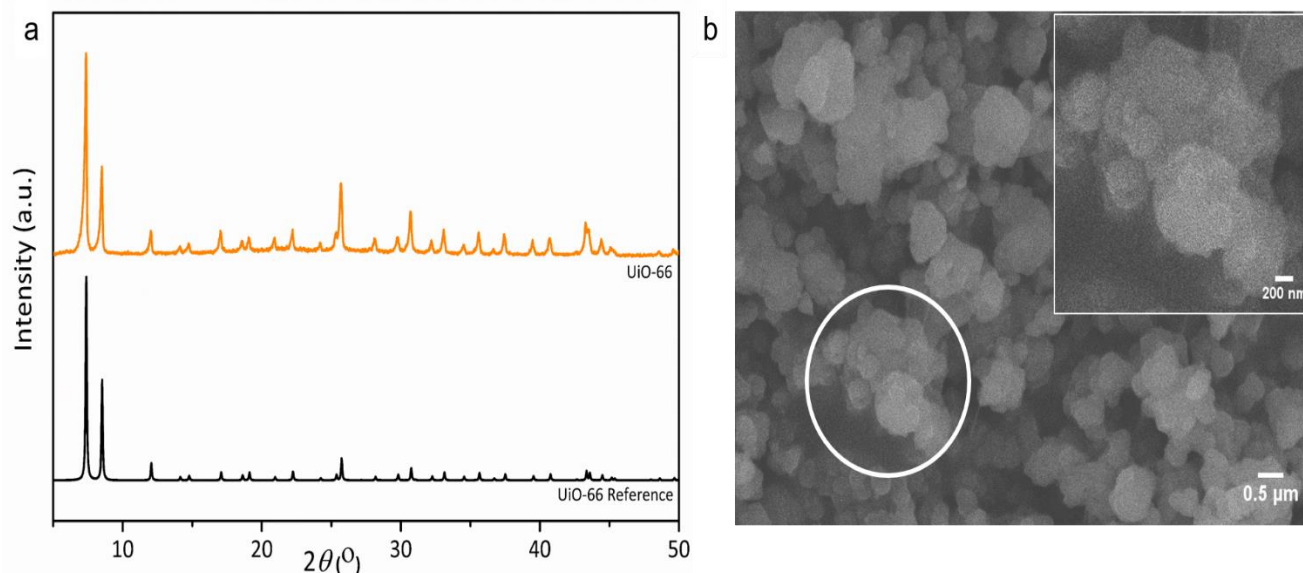

Figure S1. PXRD pattern (a) and SEM images (b) of UiO-66

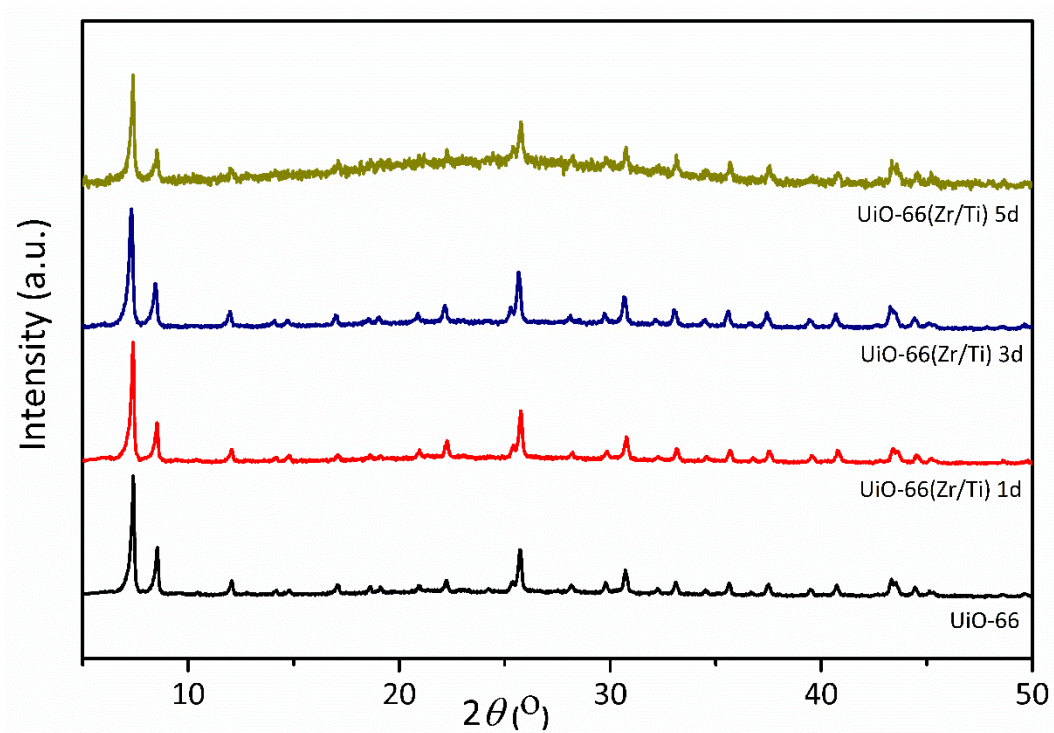

Figure S2. PXRD patterns of UiO-66(Zr/Ti) 1, 3, and 5d

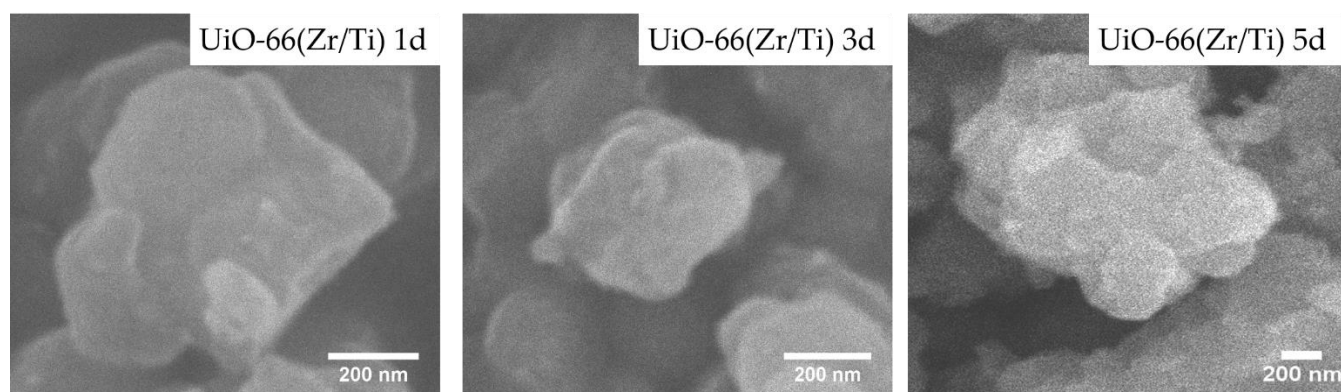

Figure S3. SEM images of UiO-66(Zr/Ti) 1, 3, and 5d

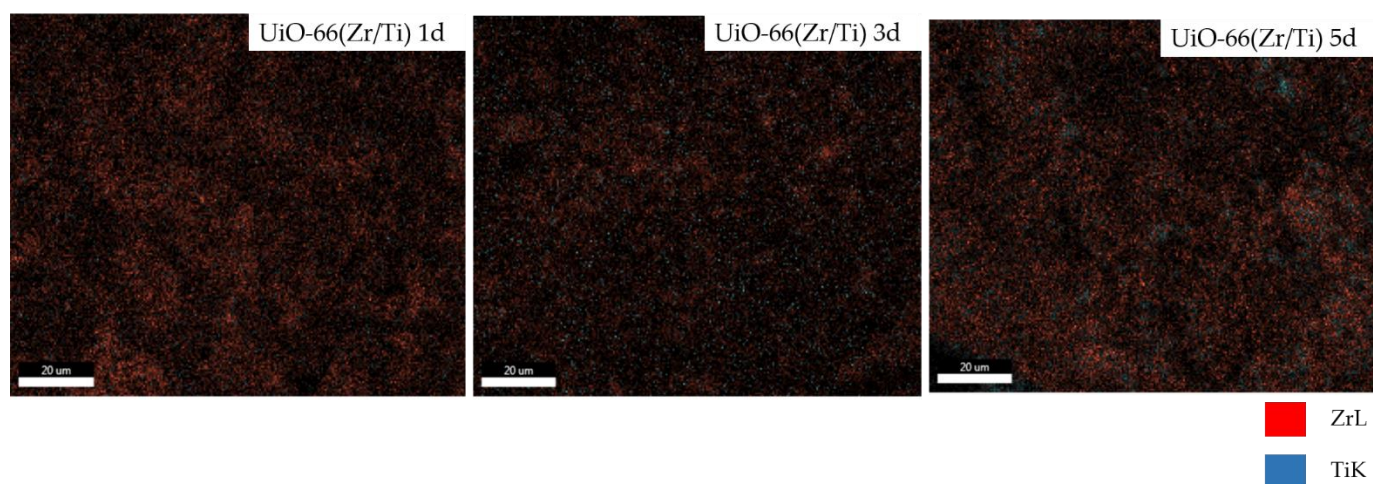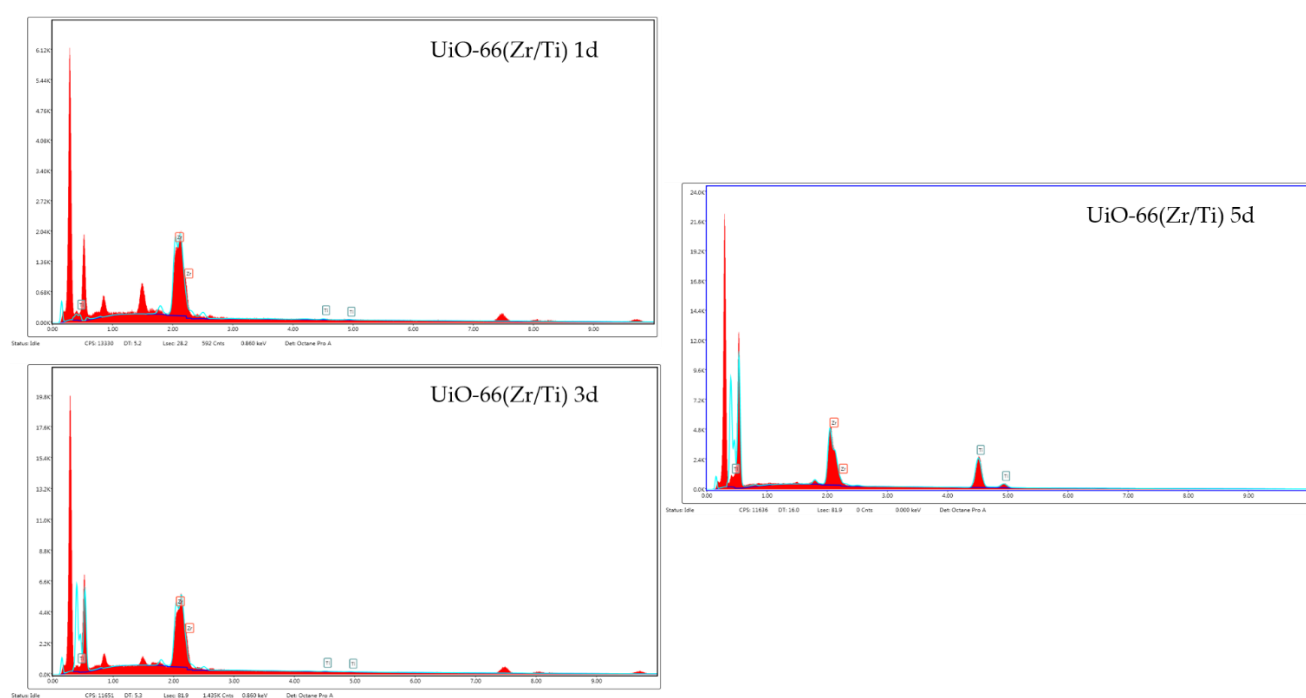

Figure S4. Elemental mapping and EDS spectrum of UiO-66(Zr/Ti) 1, 3, and 5d

Table S1. SEM-EDS analysis of % atomic of UiO-66(Zr/Ti)

| Sample           | % atomic |       |      |      |
|------------------|----------|-------|------|------|
|                  | C        | O     | Zr   | Ti   |
| UiO-66(Zr/Ti)-1d | 74.20    | 23.07 | 2.62 | 0.11 |
| UiO-66(Zr/Ti)-3d | 74.05    | 23.47 | 2.37 | 0.11 |
| UiO-66(Zr/Ti)-5d | 64.64    | 30.03 | 1.86 | 3.47 |



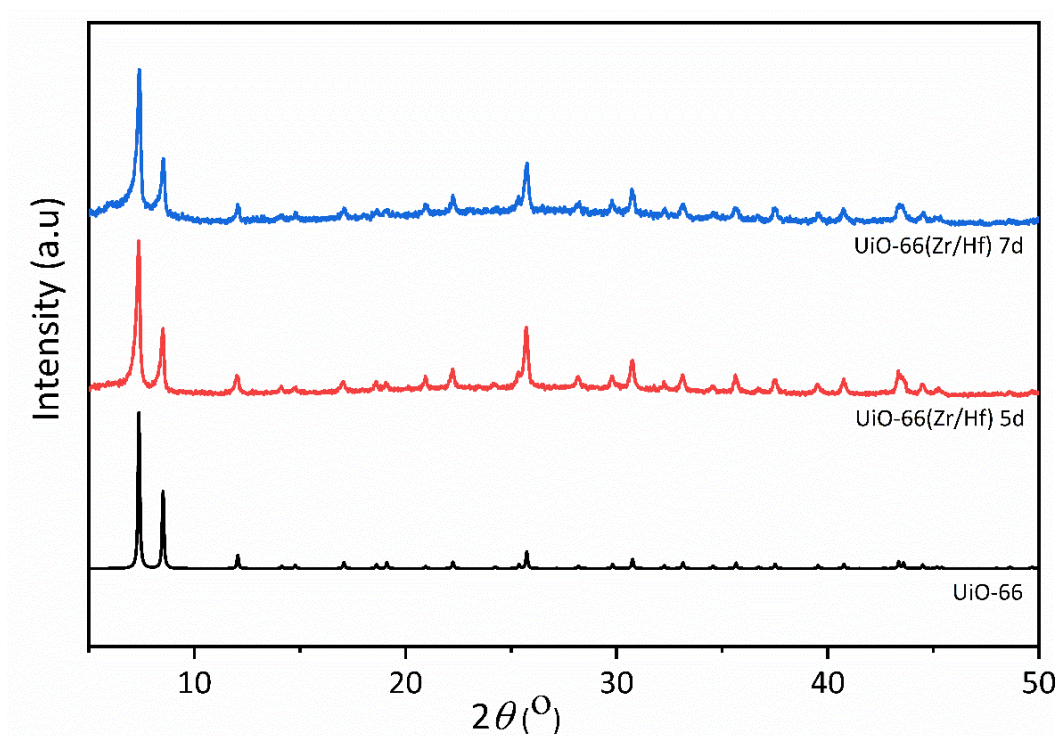

Figure S5. PXRD patterns of UiO-66 (Zr/Hf) 5 and 7d

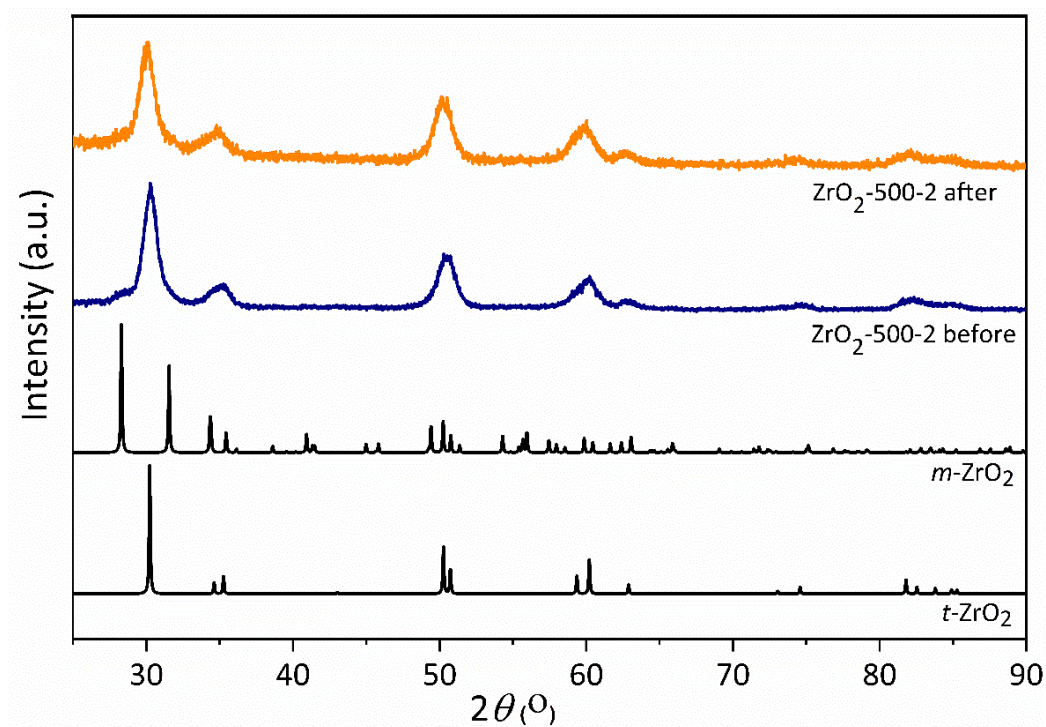

Figure S6. PXRD patterns of *t*-ZrO<sub>2</sub> before and after successive catalytic cycle
